# Supplementary material
Source: PubMed Central journal article supplement (PMC2259058)
Supplement: plntphys_pp.107.111609_1.pdf [file plntphys_pp.107.111609_1.pdf]

## Expression

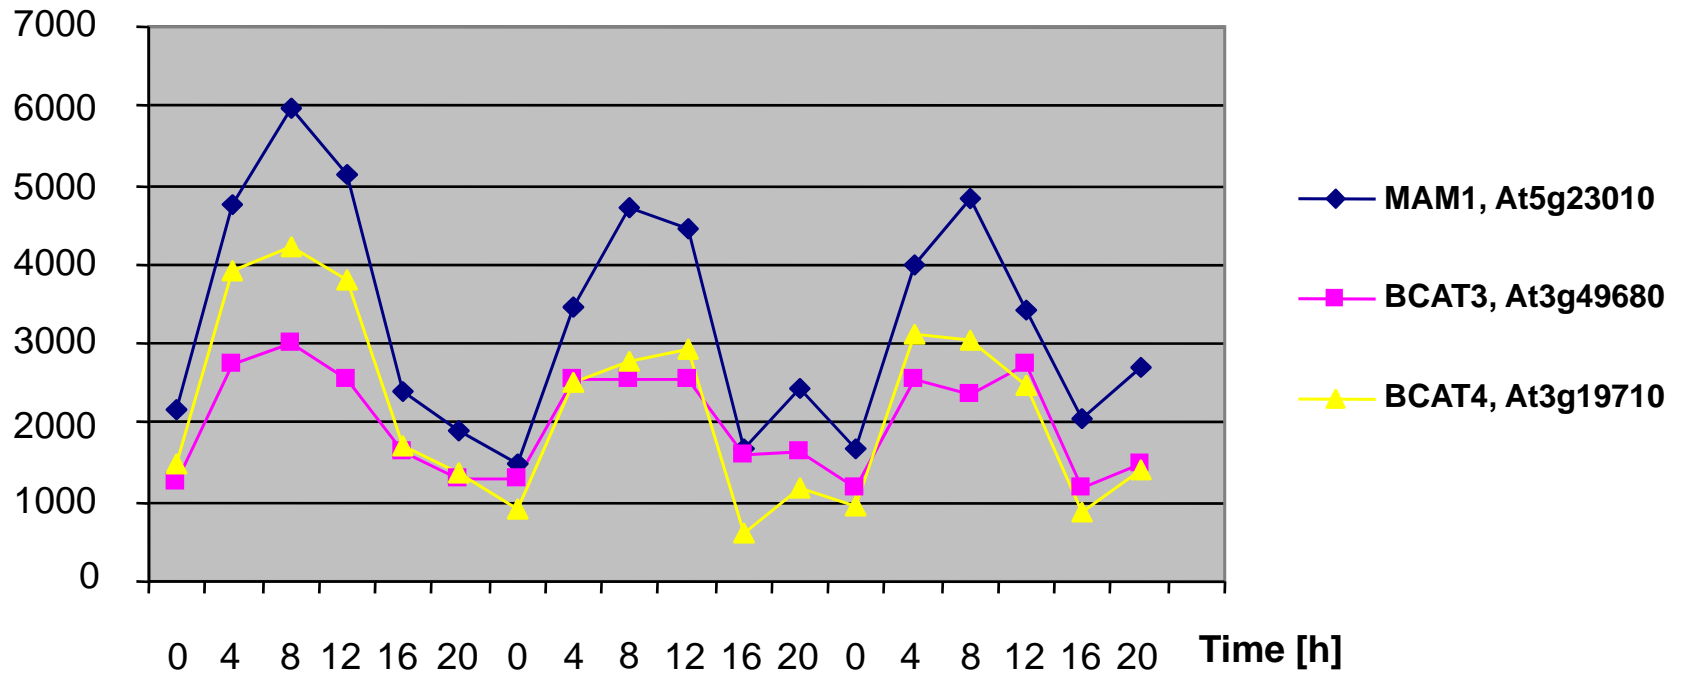

Time-resolved expression of *BCAT 3* (*At3g49680*), *BCAT4* (*At3g19710*) and *MAM1* (*At5g23010*). Data were collected from Bläsing et al. 2005, *Plant Cell*, 17, 32-3281. Shown is the expression of three independent experiments.
