# Supplementary material
Source: PubMed Central journal article supplement (PMC2259058)
Supplement: plntphys_pp.107.111609_3.pdf [file plntphys_pp.107.111609_3.pdf]

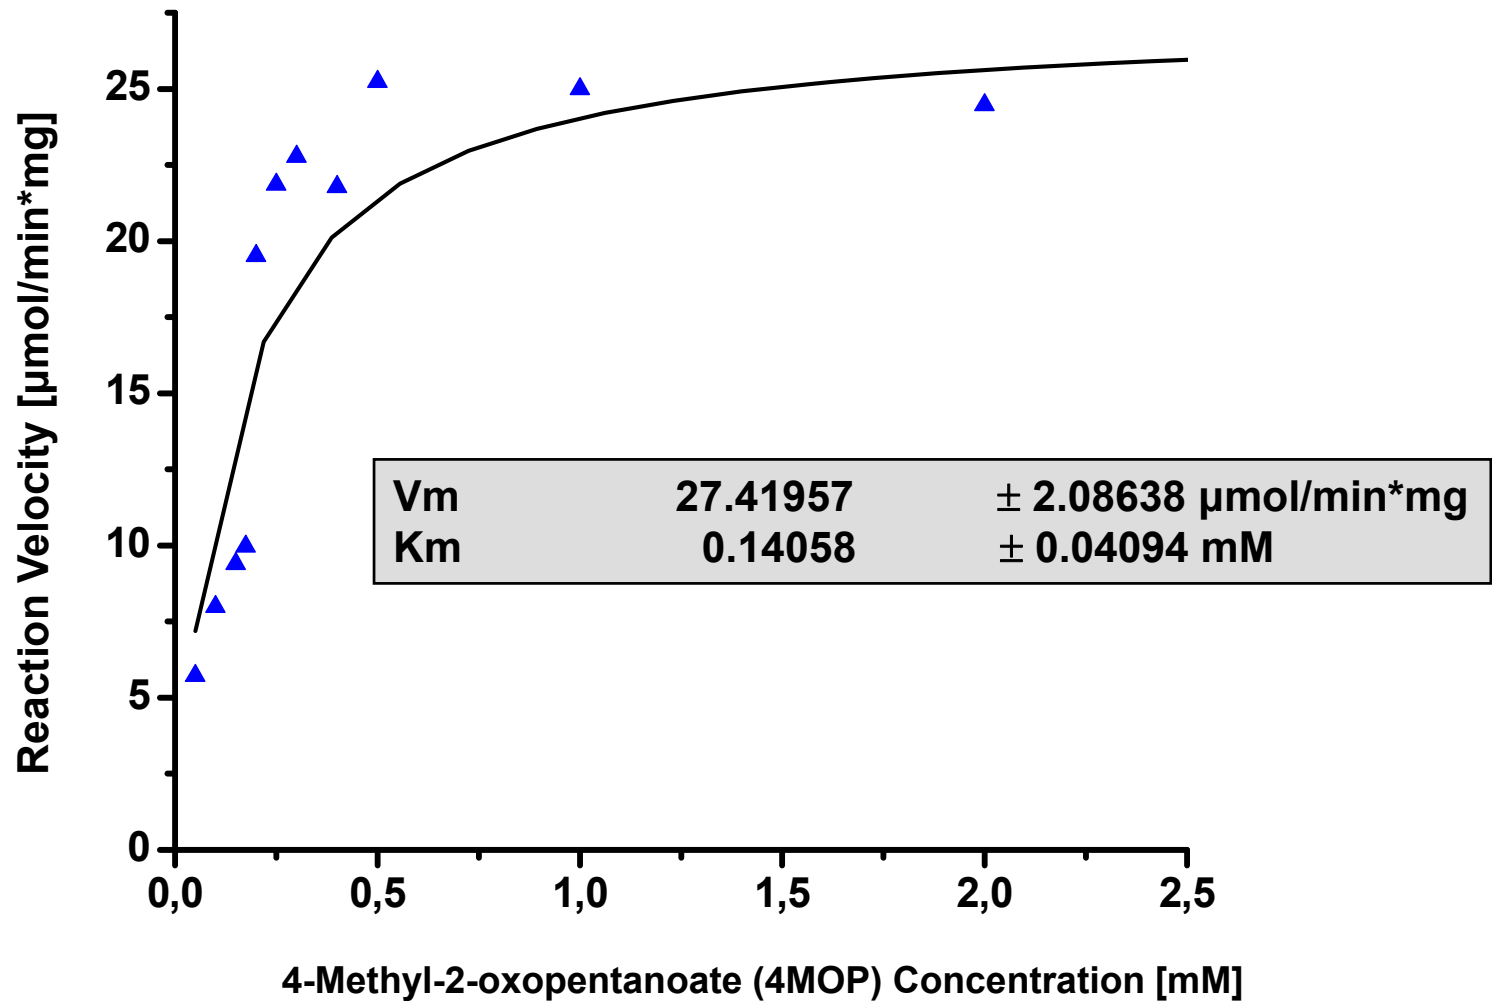

Reaction velocity is plotted against ketoisocaproate concentration. The data were fitted into a non-linear regression, which allows the calculation of the above mentioned  $V_{\max}$  and  $K_m$  values.
