# Supplementary material
Source: PubMed Central journal article supplement (PMC2259058)
Supplement: plntphys_pp.107.111609_4.pdf [file plntphys_pp.107.111609_4.pdf]

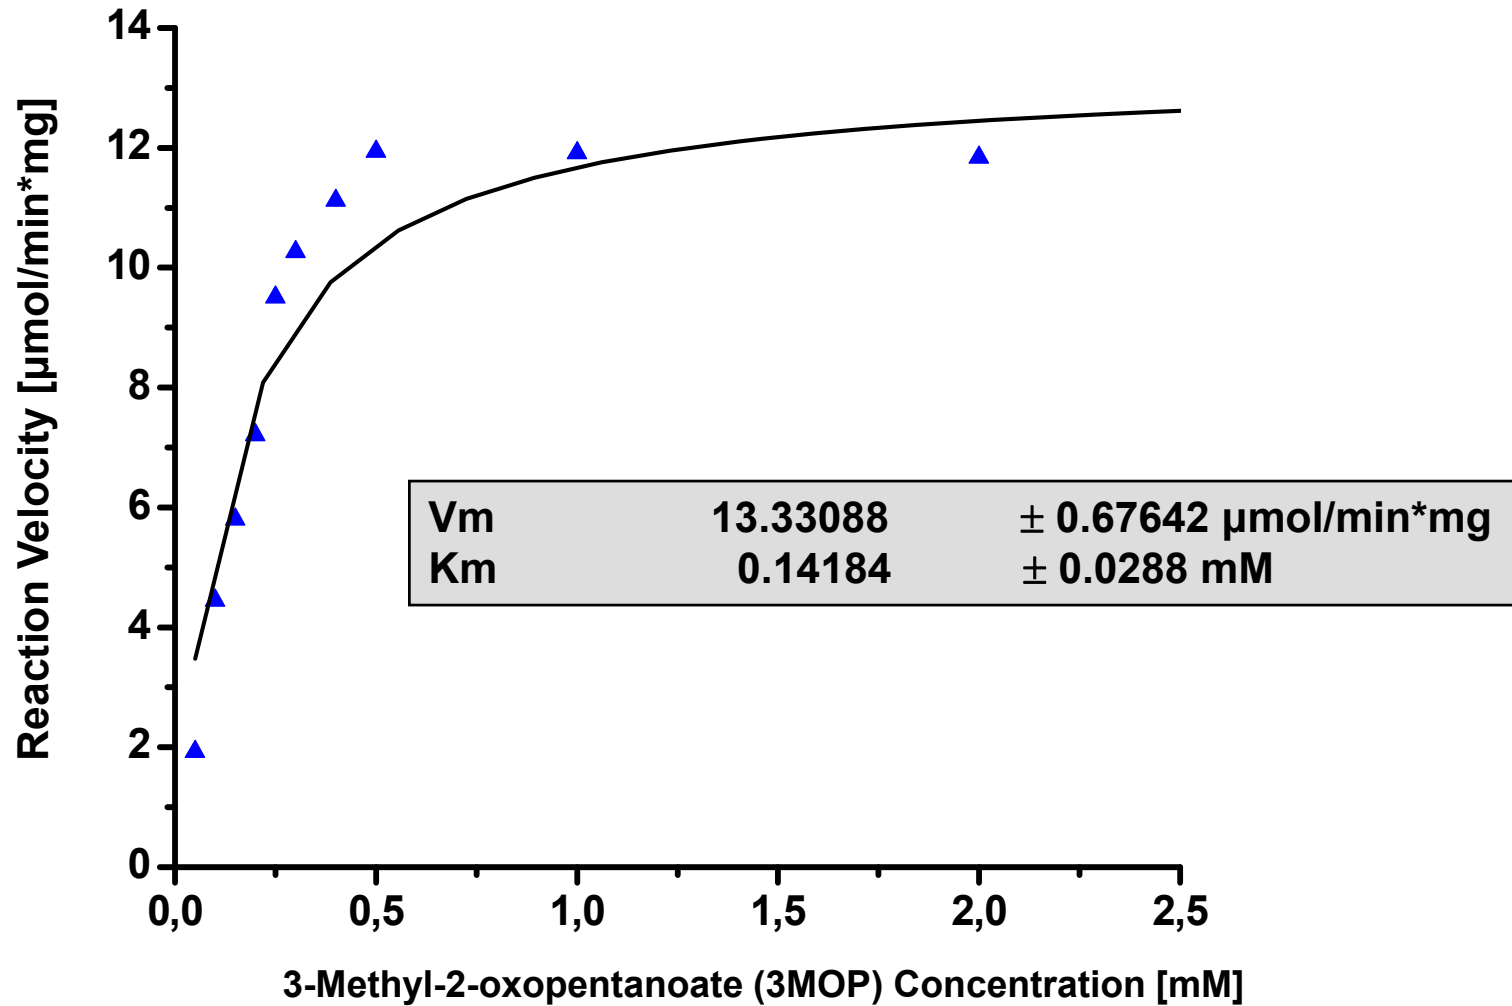

Plotting of reactions velocity against methionine concentration revealed that BCAT3 shows Michaelis-Menten kinetics. The above mentioned Vmax and Km values are calculated by fitting the data into a non-linear regression.
