# Supplementary material
Source: PubMed Central journal article supplement (PMC2259058)
Supplement: plntphys_pp.107.111609_5.pdf [file plntphys_pp.107.111609_5.pdf]

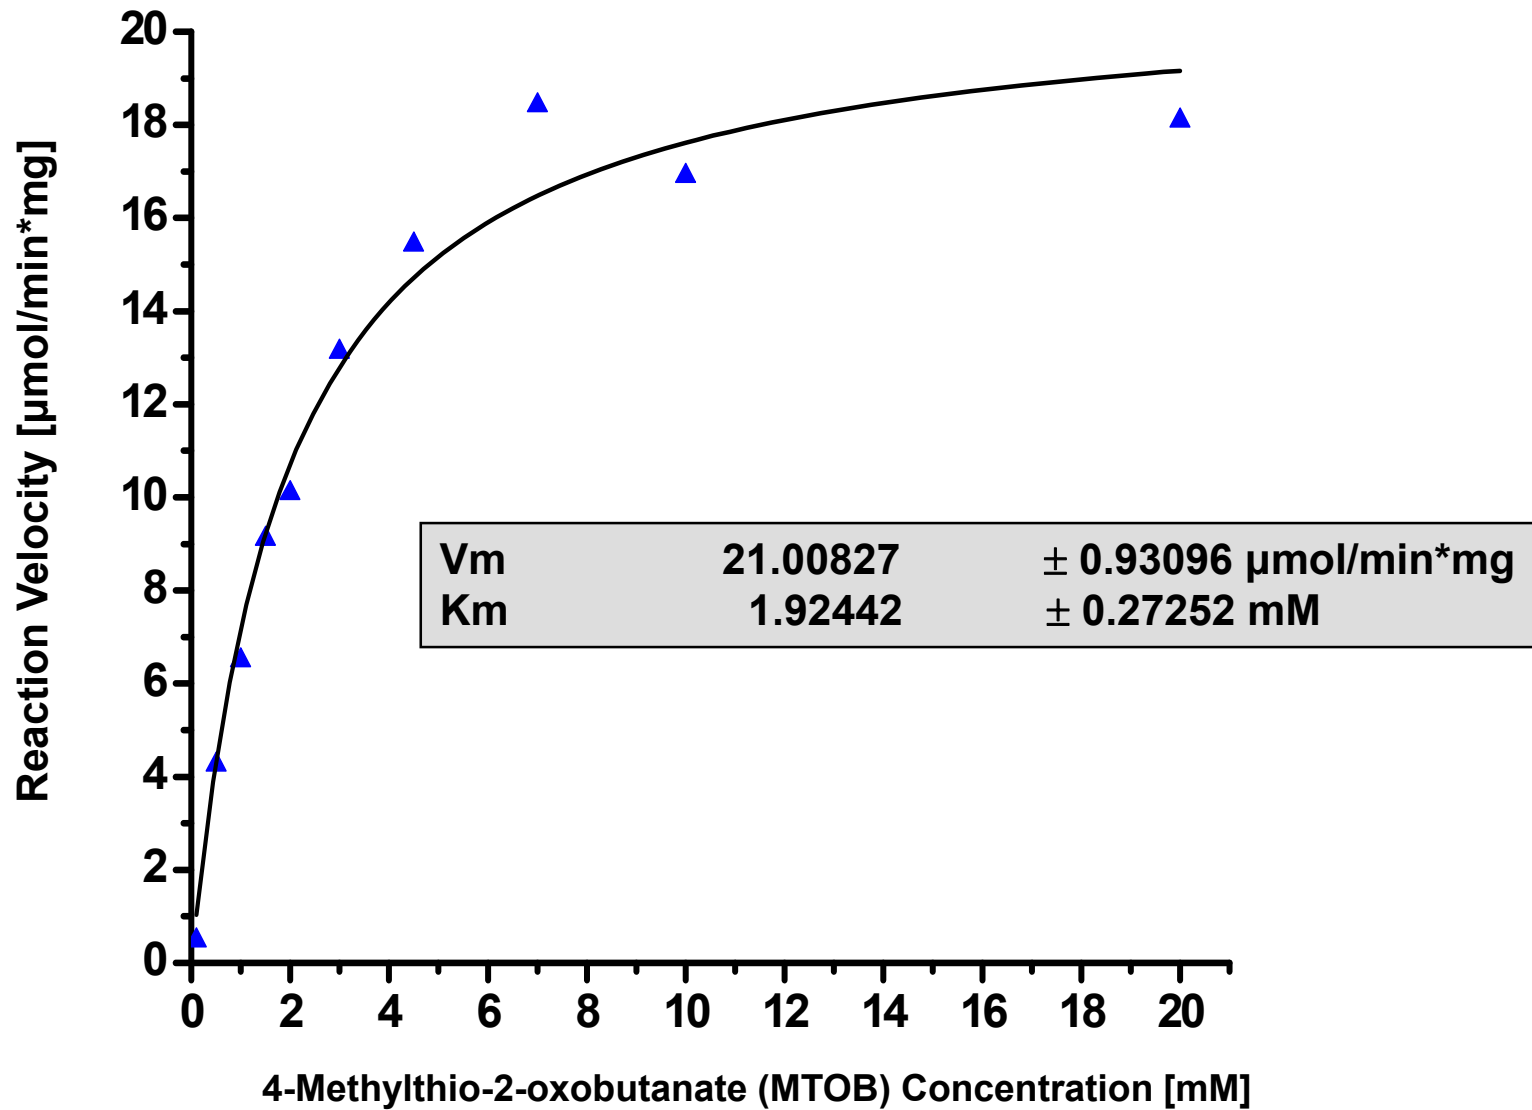

Plot of reaction velocity against substrate concentration. Fitting the data into a non-linear regression revealed the  $V_{\text{max}}$  and  $K_m$  values as indicated above.
