# Supplementary material
Source: PubMed Central journal article supplement (PMC2259058)
Supplement: plntphys_pp.107.111609_6.pdf [file plntphys_pp.107.111609_6.pdf]

**Supplementary Table 1.** Amino acid contents in leaves of Col-0 wild-type plants 4.5 h after administration of BCAAs.

| Amino acid content [nmol/mg dry weight] |                |                |                |                    |
|-----------------------------------------|----------------|----------------|----------------|--------------------|
| Amino acid                              | Col-0 wt / Ile | Col-0 wt / Leu | Col-0 wt / Val | Col-0 wt / control |
| Total AA                                | 139.18 ± 30.94 | 133.90 ± 12.87 | 143.86 ± 8.41  | 135.72 ± 2.79      |
| Ile                                     | 3.67 ± 1.06    | 0.28 ± 0.07    | 0.30 ± 0.03    | 0.25 ± 0.01        |
| Leu                                     | 0.27 ± 0.05    | 1.50 ± 0.33    | 0.36 ± 0.07    | 0.20 ± 0.03        |
| Thr                                     | 8.50 ± 1.90    | 5.72 ± 0.46    | 6.32 ± 0.15    | 6.43 ± 0.11        |
| Val                                     | 0.85 ± 0.12    | 0.61 ± 0.06    | 2.23 ± 0.30    | 0.86 ± 0.02        |

**Supplementary Table 2.** Amino acid contents in leaves of *bcat3-1* plants 4.5 h after administration of BCAAs.

| Amino acid content [nmol/mg dry weight] |                      |                      |                      |                          |
|-----------------------------------------|----------------------|----------------------|----------------------|--------------------------|
| Amino acid                              | <i>bcat3-1</i> / Ile | <i>bcat3-1</i> / Leu | <i>bcat3-1</i> / Val | <i>bcat3-1</i> / control |
| Total AA                                | 178.03 ± 10.73       | 174.45 ± 8.73        | 169.61 ± 6.63        | 153.87 ± 9.01            |
| Ile                                     | 6.53 ± 1.86          | 0.34 ± 0.06          | 0.37 ± 0.07          | 0.30 ± 0.03              |
| Leu                                     | 0.64 ± 0.09          | 3.28 ± 1.08          | 0.48 ± 0.15          | 0.40 ± 0.08              |
| Thr                                     | 9.82 ± 0.38          | 6.47 ± 0.35          | 6.50 ± 0.29          | 6.32 ± 0.25              |
| Val                                     | 0.69 ± 0.06          | 0.50 ± 0.11          | 2.55 ± 0.44          | 0.70 ± 0.04              |

**Supplementary Table 3.** Amino acid contents in leaves of wild-type plants after repeated administrations of BCAAs.

| Amino acid | Amino acid content [nmol/mg] |                |                |                    |            |            |            |
|------------|------------------------------|----------------|----------------|--------------------|------------|------------|------------|
|            | Col-0 wt / Ile               | Col-0 wt / Leu | Col-0 wt / Val | Col-0 wt / control | t-test Ile | t-test Leu | t-test Val |
| Total AA   | 154.01 ± 13.30               | 170.93 ± 12.30 | 200.55 ± 12.50 | 147.80 ± 7.32      | 0.32529    | 0.00374    | 0.00000    |
| Ala        | 6.80 ± 0.85                  | 7.10 ± 1.27    | 8.28 ± 1.08    | 5.92 ± 0.85        | 0.07259    | 0.09734    | 0.00124    |
| Arg        | 0.92 ± 0.08                  | 0.82 ± 0.10    | 0.82 ± 0.15    | 0.74 ± 0.12        | 0.00429    | 0.28542    | 0.28966    |
| Asn        | 6.12 ± 0.70                  | 6.36 ± 1.06    | 9.14 ± 0.57    | 5.26 ± 0.46        | 0.02069    | 0.04631    | 0.00000    |
| Asp        | 20.48 ± 2.30                 | 18.62 ± 1.09   | 19.75 ± 0.94   | 15.36 ± 1.05       | 0.00022    | 0.00071    | 0.00001    |
| Gln        | 76.80 ± 12.66                | 90.43 ± 11.63  | 109.30 ± 10.94 | 71.68 ± 3.42       | 0.35632    | 0.00425    | 0.00001    |
| Glu        | 29.87 ± 3.61                 | 32.06 ± 2.21   | 34.42 ± 1.51   | 26.40 ± 0.80       | 0.03939    | 0.00023    | 0.00000    |
| Gly        | 1.36 ± 0.36                  | 1.08 ± 0.25    | 2.45 ± 0.75    | 0.62 ± 0.14        | 0.00038    | 0.00415    | 0.00010    |
| His        | 0.31 ± 0.06                  | 0.24 ± 0.08    | 0.38 ± 0.05    | 0.22 ± 0.05        | 0.01429    | 0.63548    | 0.00009    |
| Ile        | 0.60 ± 0.10                  | 0.38 ± 0.05    | 0.39 ± 0.06    | 0.44 ± 0.12        | 0.01787    | 0.37490    | 0.40114    |
| Leu        | 0.63 ± 0.18                  | 0.58 ± 0.21    | 0.62 ± 0.13    | n.d.*              | -          | -          | -          |
| Lys        | 0.44 ± 0.08                  | 0.41 ± 0.11    | 0.43 ± 0.09    | 0.48 ± 0.20        | 0.60001    | 0.49170    | 0.55615    |
| Met        | 0.21 ± 0.05                  | 0.19 ± 0.07    | 0.22 ± 0.05    | 0.36 ± 0.17        | 0.02869    | 0.06808    | 0.06302    |
| Phe        | 0.37 ± 0.04                  | 0.31 ± 0.07    | 0.33 ± 0.06    | 0.36 ± 0.13        | 0.77669    | 0.47900    | 0.54476    |
| Ser        | 7.77 ± 0.65                  | 7.46 ± 1.00    | 8.33 ± 0.65    | 8.92 ± 0.63        | 0.00479    | 0.01631    | 0.12664    |
| SMM        | 0.00 ± 0.00                  | 0.00 ± 0.00    | 0.00 ± 0.00    | 0.00 ± 0.00        | -          | -          | -          |
| Thr        | 4.39 ± 0.33                  | 3.70 ± 0.37    | 4.35 ± 0.38    | 3.18 ± 0.31        | 0.00001    | 0.03356    | 0.00009    |
| Trp        | 0.00 ± 0.00                  | 0.00 ± 0.00    | 0.00 ± 0.00    | 0.00 ± 0.00        | -          | -          | -          |
| Tyr        | 0.24 ± 0.00                  | 0.24 ± 0.00    | 0.26 ± 0.05    | 0.24 ± 0.00        | 0.04009    | 0.00000    | 0.37737    |
| Val        | 1.00 ± 0.13                  | 0.94 ± 0.10    | 1.08 ± 0.10    | 1.10 ± 0.14        | 0.18802    | 0.05703    | 0.76838    |

\*n.d.: not determined in this series. Comparison of Leu levels to other wt controls showed similar levels of this amino acid after feeding of the different BCAAs.

**Supplementary Table 4.** Amino acid contents in leaves of *bcat3-1* plants after repeated administrations of BCAAs.

| Amino acid | Amino acid content [nmol/mg] |                      |                      |                          |            |            |            |
|------------|------------------------------|----------------------|----------------------|--------------------------|------------|------------|------------|
|            | <i>bcat3-1</i> / Ile         | <i>bcat3-1</i> / Leu | <i>bcat3-1</i> / Val | <i>bcat3-1</i> / control | t-test Ile | t-test Leu | t-test Val |
| Total AA   | 165.90 ± 19.14               | 186.19 ± 7.02        | 197.26 ± 23.42       | 165.11 ± 17.58           | 0.93701    | 0.02819    | 0.01226    |
| Ala        | 7.36 ± 0.62                  | 10.01 ± 0.52         | 9.80 ± 0.29          | 7.01 ± 0.66              | 0.32591    | 0.00000    | 0.00000    |
| Arg        | 1.00 ± 0.16                  | 0.94 ± 0.16          | 0.92 ± 0.12          | 0.86 ± 0.08              | 0.04659    | 0.23288    | 0.24858    |
| Asn        | 6.18 ± 0.92                  | 8.81 ± 0.73          | 7.72 ± 1.36          | 6.42 ± 0.72              | 0.59423    | 0.00013    | 0.03897    |
| Asp        | 20.64 ± 1.46                 | 16.51 ± 1.25         | 17.92 ± 0.99         | 19.92 ± 2.22             | 0.50500    | 0.01005    | 0.06379    |
| Gln        | 79.68 ± 9.43                 | 100.22 ± 4.97        | 107.68 ± 19.22       | 82.44 ± 12.43            | 0.65841    | 0.01182    | 0.01124    |
| Glu        | 32.32 ± 2.89                 | 30.91 ± 2.08         | 33.12 ± 3.02         | 31.44 ± 3.19             | 0.60543    | 0.75049    | 0.33888    |
| Gly        | 1.36 ± 0.35                  | 1.92 ± 0.35          | 2.24 ± 0.70          | 1.32 ± 0.48              | 0.86665    | 0.03477    | 0.01280    |
| His        | 0.40 ± 0.10                  | 0.36 ± 0.00          | 0.38 ± 0.09          | 0.33 ± 0.06              | 0.11451    | 0.26002    | 0.22342    |
| Ile        | 0.65 ± 0.18                  | 0.43 ± 0.11          | 0.44 ± 0.15          | 0.42 ± 0.06              | 0.01120    | 0.80333    | 0.73246    |
| Leu        | 0.80 ± 0.33                  | 0.82 ± 0.10          | 0.70 ± 0.05          | 0.66 ± 0.16              | 0.30765    | 0.63525    | 0.24084    |
| Lys        | 0.54 ± 0.20                  | 0.46 ± 0.30          | 0.52 ± 0.21          | 0.53 ± 0.13              | 0.86521    | 0.57021    | 0.95667    |
| Met        | 0.24 ± 0.08                  | 0.24 ± 0.00          | 0.24 ± 0.08          | 0.21 ± 0.06              | 0.40816    | 0.26002    | 0.40816    |
| Phe        | 0.42 ± 0.10                  | 0.46 ± 0.10          | 0.44 ± 0.16          | 0.41 ± 0.06              | 0.73545    | 0.27709    | 0.58657    |
| Ser        | 7.24 ± 0.90                  | 8.06 ± 0.32          | 8.38 ± 1.25          | 8.01 ± 0.61              | 0.07874    | 0.85936    | 0.47714    |
| SMM        | 0.00 ± 0.00                  | 0.00 ± 0.00          | 0.00 ± 0.00          | 0.00 ± 0.00              | -          | -          | -          |
| Thr        | 5.18 ± 1.71                  | 4.78 ± 0.29          | 4.82 ± 0.43          | 4.02 ± 0.29              | 0.08070    | 0.00083    | 0.00138    |
| Trp        | 0.00 ± 0.00                  | 0.00 ± 0.00          | 0.00 ± 0.00          | 0.00 ± 0.00              | -          | -          | -          |
| Tyr        | 0.26 ± 0.05                  | 0.29 ± 0.07          | 0.28 ± 0.06          | 0.24 ± 0.00              | 0.26430    | 0.05714    | 0.08883    |
| Val        | 0.92 ± 0.15                  | 0.98 ± 0.20          | 1.10 ± 0.23          | 0.89 ± 0.11              | 0.61607    | 0.26466    | 0.03934    |

**Supplementary Table 5.** Glucosinolate contents in leaves of wild-type plants after repeated administrations of BCAAs.

| Glucosinolate content [ $\mu\text{mol/g}$ dry weight ] |                  |                  |                  |                    |            |            |            |
|--------------------------------------------------------|------------------|------------------|------------------|--------------------|------------|------------|------------|
| GS                                                     | Col-0 wt / Ile   | Col-0 wt / Leu   | Col-0 wt / Val   | Col-0 wt / control | t-test Ile | t-test Leu | t-test Val |
| Total Met GS                                           | 20,38 $\pm$ 3,43 | 19,07 $\pm$ 1,34 | 19,28 $\pm$ 1,59 | 18,29 $\pm$ 1,51   | 0,16593    | 0,37314    | 0,25350    |
| Total GS                                               | 23,07 $\pm$ 3,83 | 21,87 $\pm$ 1,49 | 22,01 $\pm$ 1,67 | 20,92 $\pm$ 1,61   | 0,19782    | 0,32419    | 0,23821    |
| 3MSOP                                                  | 1,83 $\pm$ 0,35  | 1,70 $\pm$ 0,15  | 1,77 $\pm$ 0,17  | 1,71 $\pm$ 0,12    | 0,38811    | 0,85328    | 0,46672    |
| 4MSOB                                                  | 15,41 $\pm$ 2,75 | 14,59 $\pm$ 1,10 | 14,98 $\pm$ 1,24 | 14,36 $\pm$ 1,28   | 0,37575    | 0,74690    | 0,37549    |
| 5MSOP                                                  | 0,83 $\pm$ 0,22  | 0,84 $\pm$ 0,05  | 0,61 $\pm$ 0,23  | 0,73 $\pm$ 0,14    | 0,31126    | 0,12908    | 0,26445    |
| 7MSOH                                                  | 0,34 $\pm$ 0,04  | 0,29 $\pm$ 0,02  | 0,33 $\pm$ 0,02  | 0,24 $\pm$ 0,02    | 0,00029    | 0,00232    | 0,00001    |
| 8MSOO                                                  | 1,96 $\pm$ 0,21  | 1,66 $\pm$ 0,09  | 1,59 $\pm$ 0,10  | 1,25 $\pm$ 0,20    | 0,00003    | 0,00183    | 0,00162    |
| 4MP                                                    | 0,00 $\pm$ 0,00  | 0,25 $\pm$ 0,05  | 0,00 $\pm$ 0,00  | 0,00 $\pm$ 0,00    | -          | 0,00000    | -          |
| 5MH                                                    | 0,00 $\pm$ 0,00  | 0,20 $\pm$ 0,03  | 0,00 $\pm$ 0,00  | 0,00 $\pm$ 0,00    | -          | 0,00000    | -          |
| I3M                                                    | 1,69 $\pm$ 0,32  | 1,77 $\pm$ 0,12  | 1,83 $\pm$ 0,11  | 1,87 $\pm$ 0,11    | 0,19607    | 0,15007    | 0,56657    |
| 1MOI3M                                                 | 0,55 $\pm$ 0,14  | 0,38 $\pm$ 0,09  | 0,50 $\pm$ 0,06  | 0,40 $\pm$ 0,08    | 0,03175    | 0,60617    | 0,03129    |
| 4MOI3M                                                 | 0,23 $\pm$ 0,03  | 0,20 $\pm$ 0,02  | 0,19 $\pm$ 0,03  | 0,20 $\pm$ 0,02    | 0,01229    | 0,56312    | 0,59417    |

**Supplementary Table 6.** Glucosinolate contents in leaves of *bcat3-1* plants after repeated administrations of BCAAs.

| Glucosinolate content [ $\mu\text{mol/g}$ dry weight ] |                      |                      |                      |                          |            |            |            |
|--------------------------------------------------------|----------------------|----------------------|----------------------|--------------------------|------------|------------|------------|
| GS                                                     | <i>bcat3-1</i> / Ile | <i>bcat3-1</i> / Leu | <i>bcat3-1</i> / Val | <i>bcat3-1</i> / control | t-test Ile | t-test Leu | t-test Val |
| Total Met GS                                           | 19,76 $\pm$ 1,03     | 19,08 $\pm$ 1,18     | 17,13 $\pm$ 1,71     | 18,15 $\pm$ 1,52         | 0,06791    | 0,27844    | 0,30172    |
| Total GS                                               | 24,23 $\pm$ 1,16     | 23,43 $\pm$ 1,40     | 21,09 $\pm$ 2,44     | 21,97 $\pm$ 1,81         | 0,03559    | 0,16506    | 0,48925    |
| 3MSOP                                                  | 1,17 $\pm$ 0,07      | 1,07 $\pm$ 0,08      | 1,00 $\pm$ 0,10      | 1,05 $\pm$ 0,08          | 0,02253    | 0,64950    | 0,35824    |
| 4MSOB                                                  | 12,42 $\pm$ 0,64     | 12,52 $\pm$ 0,86     | 11,48 $\pm$ 1,08     | 12,20 $\pm$ 1,02         | 0,67913    | 0,58506    | 0,26334    |
| 5MSOP                                                  | 3,33 $\pm$ 0,23      | 3,25 $\pm$ 0,21      | 2,87 $\pm$ 0,32      | 3,03 $\pm$ 0,25          | 0,05793    | 0,13522    | 0,36275    |
| 7MSOH                                                  | 0,64 $\pm$ 0,07      | 0,55 $\pm$ 0,05      | 0,47 $\pm$ 0,08      | 0,54 $\pm$ 0,14          | 0,16517    | 0,87662    | 0,32841    |
| 8MSOO                                                  | 2,20 $\pm$ 0,18      | 1,69 $\pm$ 0,09      | 1,31 $\pm$ 0,21      | 1,33 $\pm$ 0,13          | 0,00000    | 0,00036    | 0,87222    |
| 4MP                                                    | 1,11 $\pm$ 0,19      | 1,24 $\pm$ 0,08      | 0,83 $\pm$ 0,21      | 0,78 $\pm$ 0,09          | 0,00235    | 0,00000    | 0,55405    |
| 5MH                                                    | 0,49 $\pm$ 0,04      | 0,57 $\pm$ 0,05      | 0,42 $\pm$ 0,08      | 0,41 $\pm$ 0,05          | 0,01285    | 0,00024    | 0,96781    |
| I3M                                                    | 2,07 $\pm$ 0,16      | 2,03 $\pm$ 0,16      | 2,15 $\pm$ 0,37      | 2,09 $\pm$ 0,24          | 0,89838    | 0,62648    | 0,72243    |
| 1MOI3M                                                 | 0,51 $\pm$ 0,16      | 0,33 $\pm$ 0,12      | 0,36 $\pm$ 0,15      | 0,36 $\pm$ 0,10          | 0,07994    | 0,56736    | 0,99480    |
| 4MOI3M                                                 | 0,29 $\pm$ 0,02      | 0,19 $\pm$ 0,01      | 0,20 $\pm$ 0,08      | 0,18 $\pm$ 0,02          | 0,00000    | 0,48595    | 0,49998    |
